# Supplementary material for: Significant increase in natural disturbance impacts on European forests since 1950
Source: PubMed Central journal article supplement — Glob Chang Biol. 2022 Dec 12;29(5):1359–76. doi: 10.1111/gcb.16531 (PMC10107665; doi:10.1111/gcb.16531), 2022-12-12
Supplement: GCB-29-1359-s001.pdf [file GCB-29-1359-s001.pdf]

# Significant increase in natural disturbance impacts on European forests since 1950

Patacca et al., 2022

## Supplementary materials

### Supplementary 1.

Fire-damage Conversion Factor for the countries included in the study.

calculated for the country  
average other countries of the same  
ecozone  
assumed Schelhaas et al., 2003

| Country              | FCF_m3/ha |
|----------------------|-----------|
| Austria              | 90.79487  |
| Albania              | 1.831415  |
| Belgium              | 25        |
| Bosnia & Herzegovina | 7.3       |
| Bulgaria             | 97.77624  |
| Croatia              | 16.97254  |
| Cyprus               | 36.92379  |
| Czech Republic       | 151.5152  |
| Denmark              | 25        |
| Estonia              | 39        |
| Finland              | 39        |
| France               | 25        |
| Germany              | 25        |
| Greece               | 36.92379  |
| Hungary              | 151.5152  |
| Ireland              | 25        |
| Italy                | 35.32552  |
| Latvia               | 39        |
| Lithuania            | 39        |
| Luxembourg           | 25        |
| Netherlands          | 25        |
| North Macedonia      | 16.97254  |
| Norway               | 39        |
| Poland               | 151.5152  |
| Portugal             | 42.56113  |
| Romania              | 151.5152  |
| Serbia               | 11.90575  |
| Slovakia             | 151.5152  |
| Slovenia             | 28.5      |
| Spain                | 6.452426  |
| Sweden               | 39        |
| Switzerland          | 90.79487  |
| Turkey               | 36.92379  |
| UK                   | 25        |

## Supplementary 2.

Time-series overview based on reported data only.

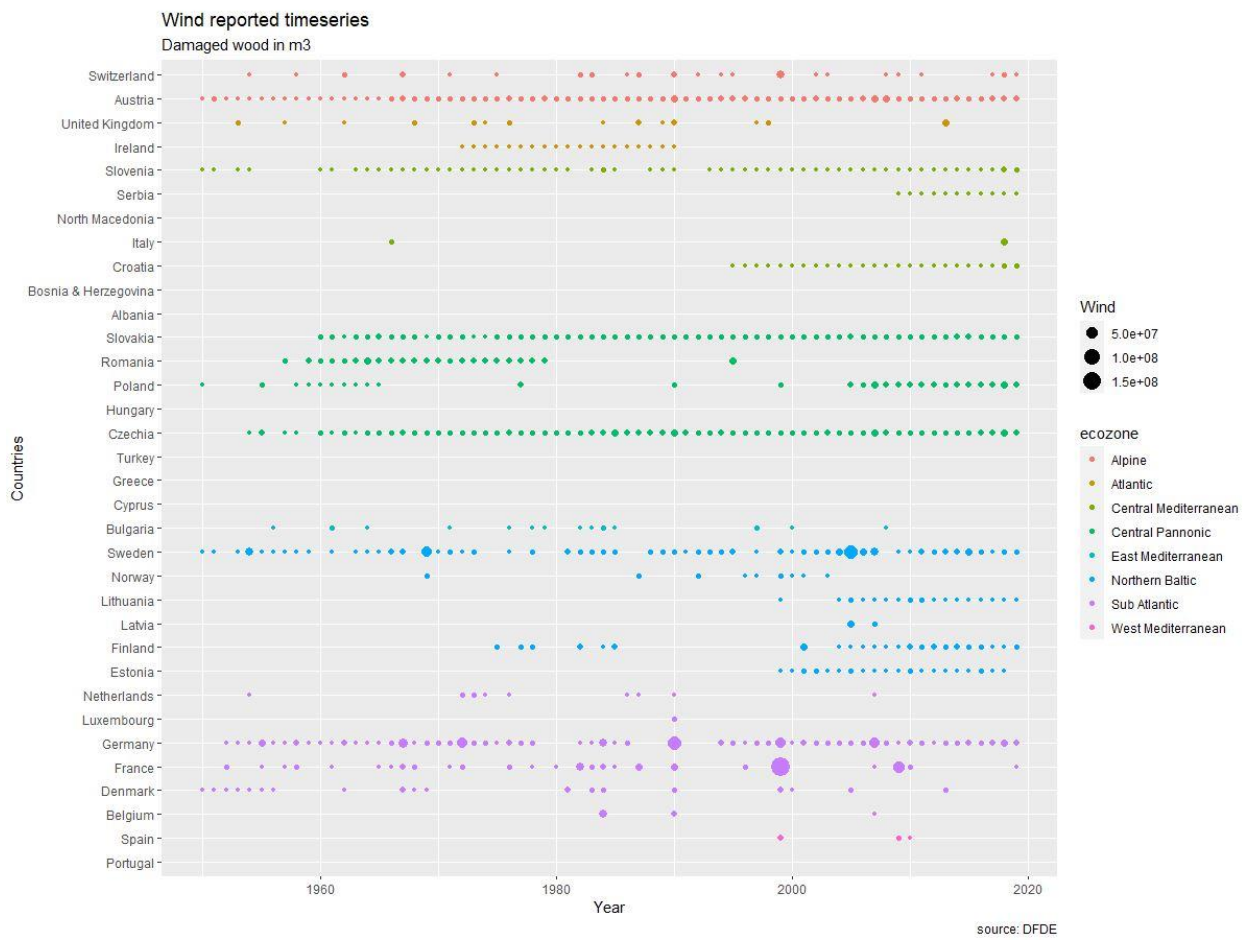

Figure 2.1: Overview of constructed timeseries of Wind damage for the 34 countries involved in this study. The raw data are sourced from the DFDE and pre-processed.

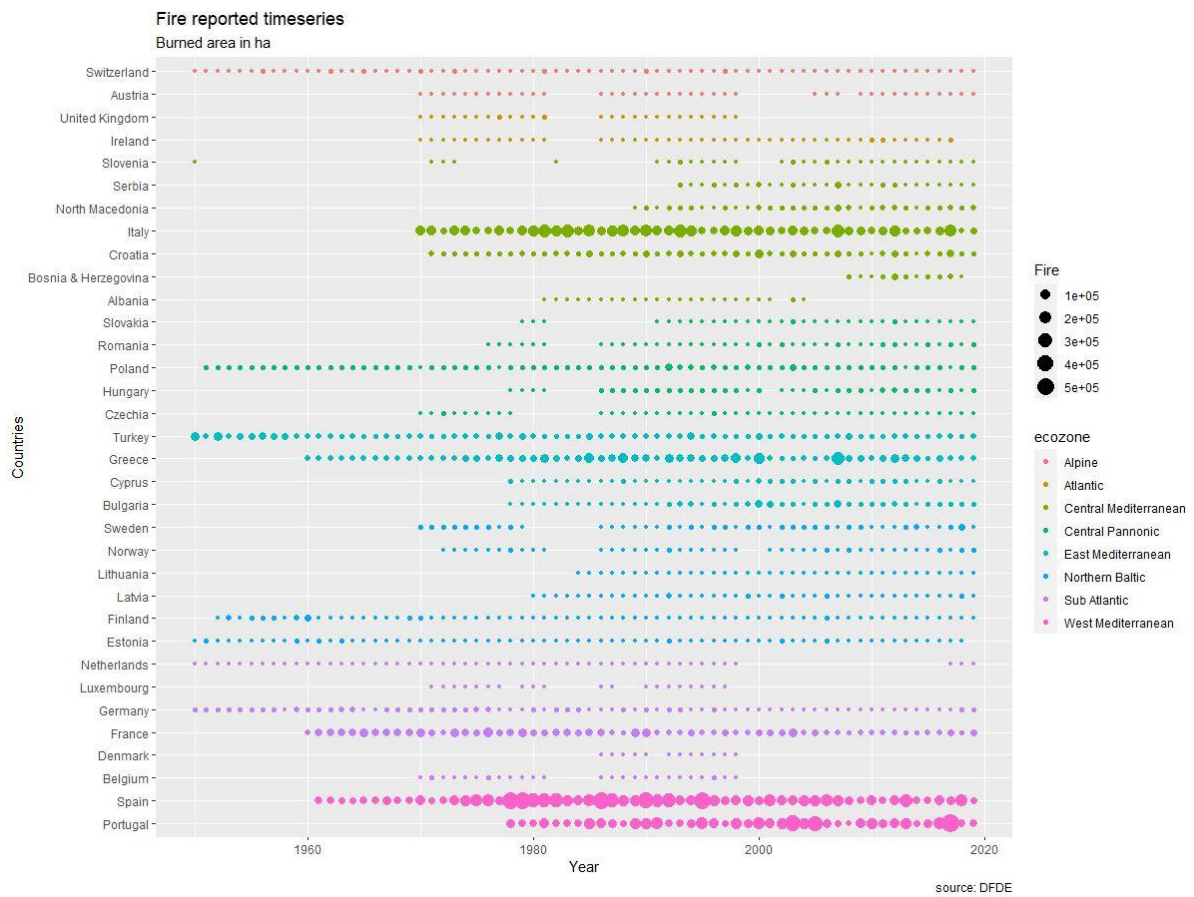

Figure 2.2: Overview of constructed timeseries of Fire damage for the 34 countries involved in this study. The raw data are sourced from the DFDE and pre-processed.

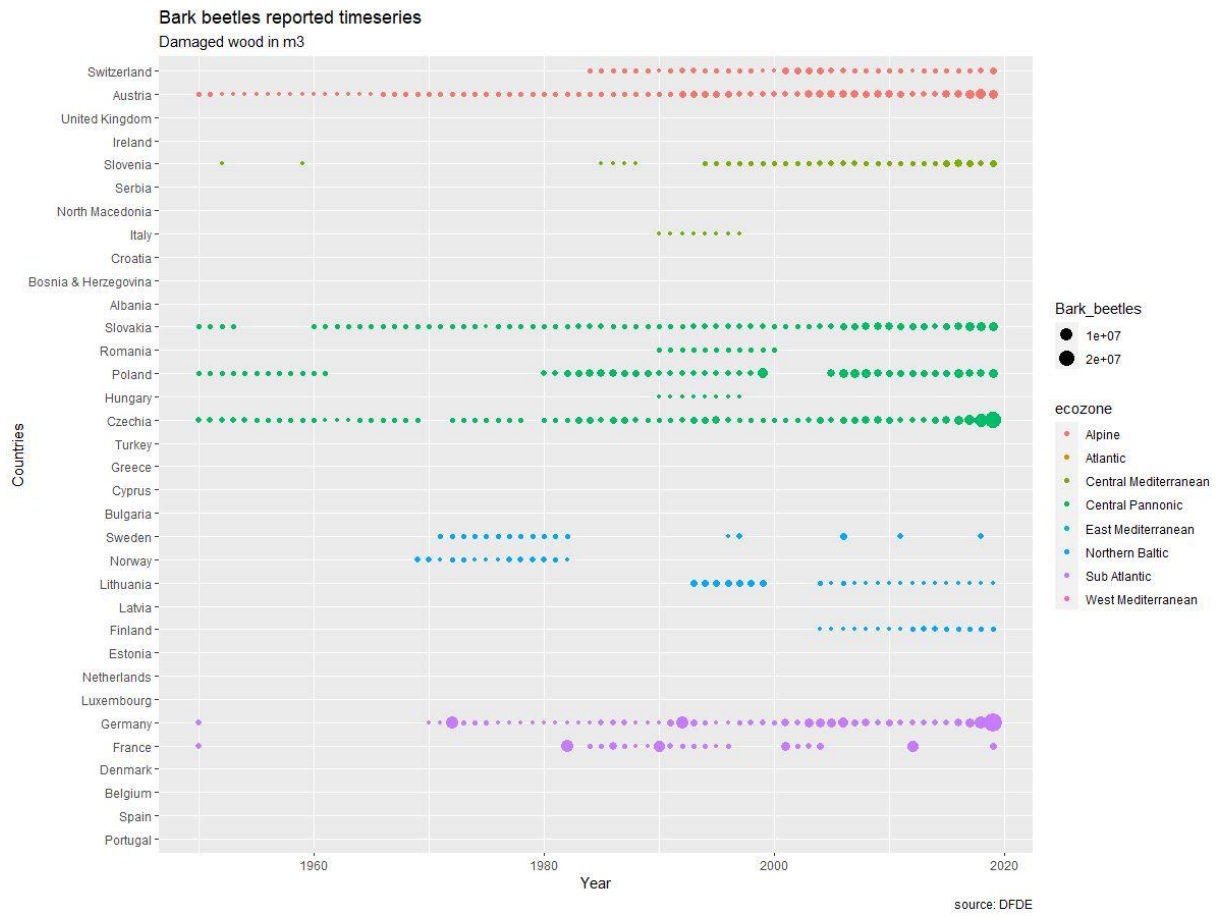

Figure 2.3: Overview of constructed timeseries of bark beetles damage for the 34 countries involved in this study. The raw data are sourced from the DFDE and pre-processed.

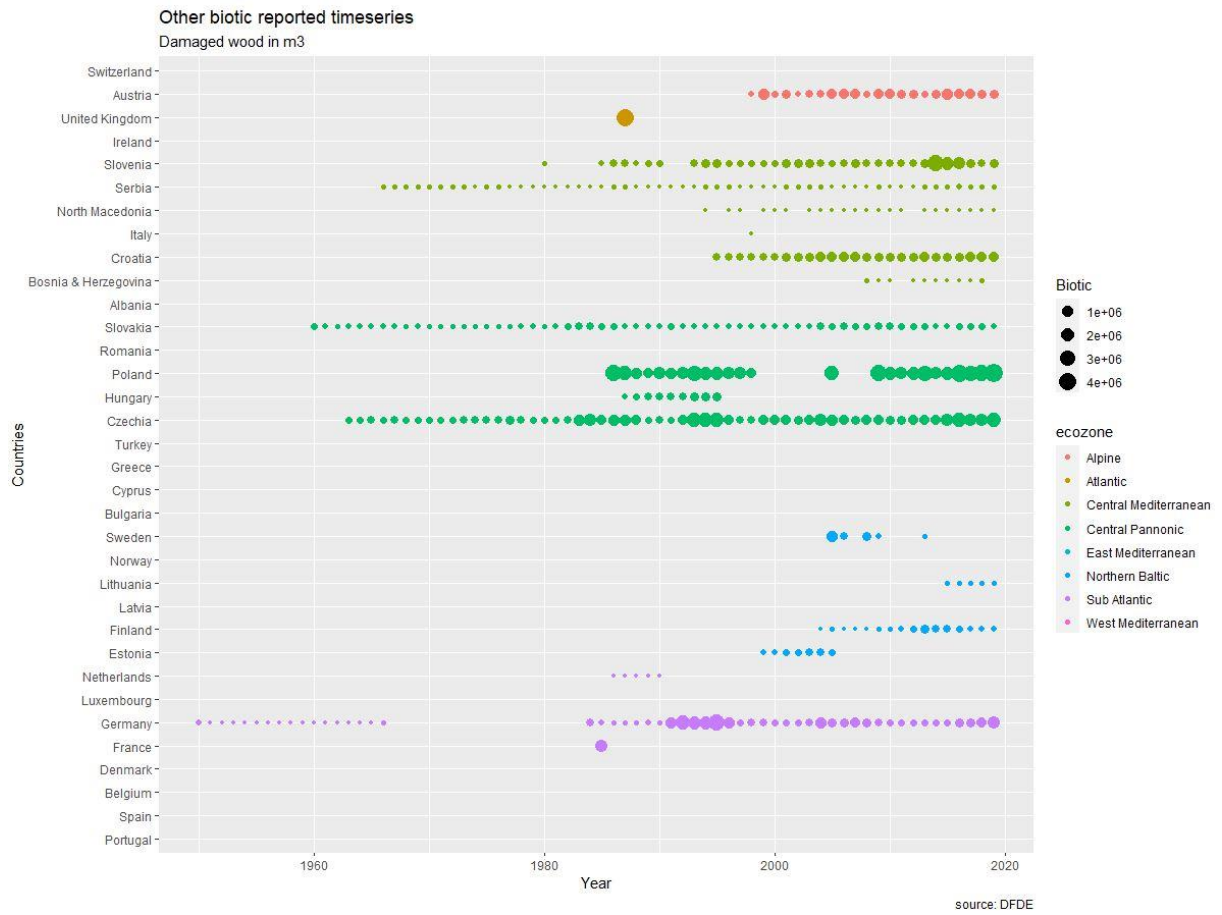

Figure 2.4: Overview of constructed timeseries of other biotic damage for the 34 countries involved in this study. The raw data are sourced from the DFDE and pre-processed.

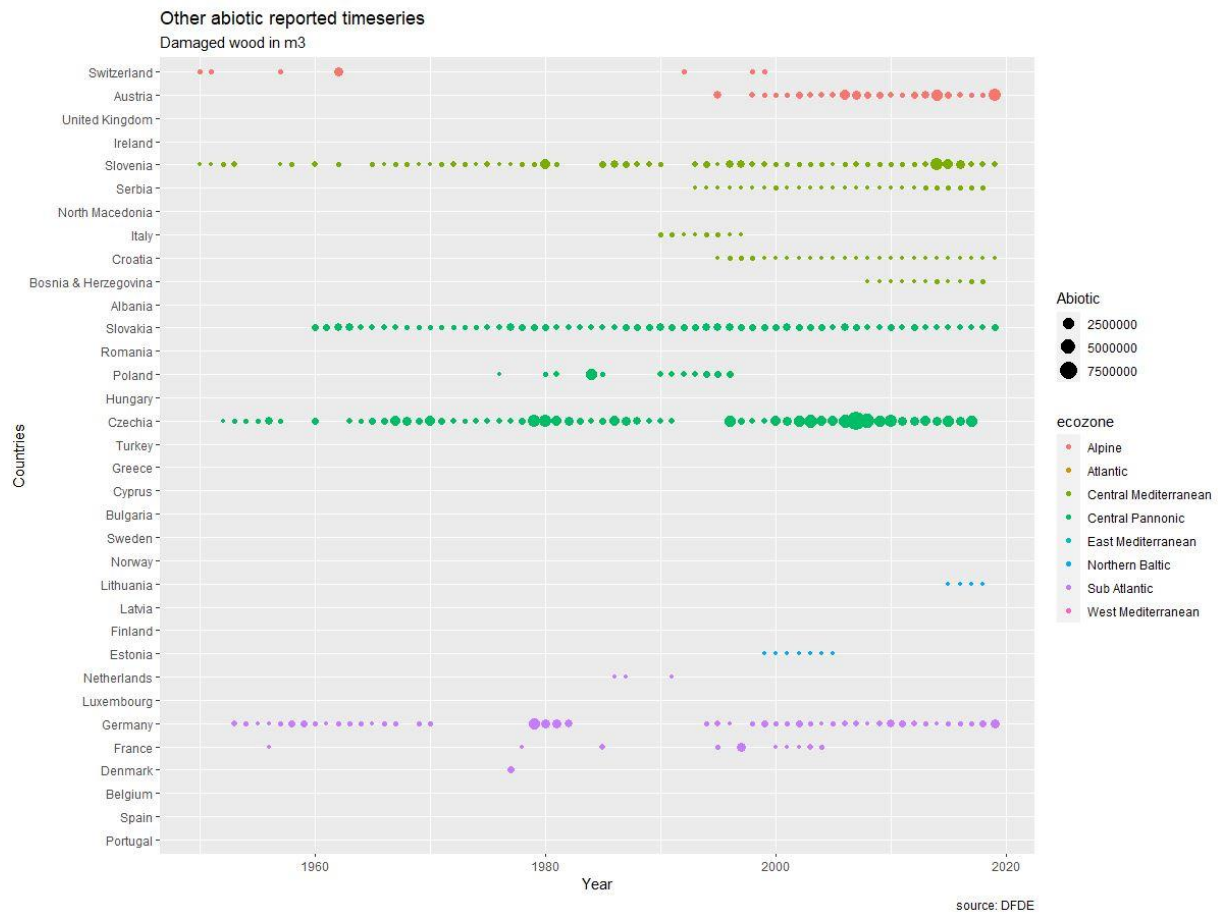

Figure 2.5: Overview of constructed timeseries of other abiotic damage for the 34 countries involved in this study. The raw data are sourced from the DFDE and pre-processed.

Table 2.1: Experts time-series interpretation, as percentage (%) of category.

|               |            | Alpine | Atlantic | Central Med | Central Pannonic | East Med | Northern/Baltic | Sub-Atlantic | West Med | Total |
|---------------|------------|--------|----------|-------------|------------------|----------|-----------------|--------------|----------|-------|
| Wind          | complete   | 100%   | 50%      | 14%         | 60%              | 25%      | 17%             | 67%          | 50%      | 41%   |
|               | uncomplete | 0%     | 50%      | 14%         | 20%              | 0%       | 83%             | 17%          | 0%       | 26%   |
|               | empty      | 0%     | 0%       | 71%         | 20%              | 75%      | 0%              | 17%          | 50%      | 32%   |
| Fire          | complete   | 50%    | 0%       | 0%          | 20%              | 25%      | 33%             | 17%          | 0%       | 18%   |
|               | uncomplete | 50%    | 100%     | 100%        | 80%              | 75%      | 67%             | 83%          | 100%     | 82%   |
|               | empty      | 0%     | 0%       | 0%          | 0%               | 0%       | 0%              | 0%           | 0%       | 0%    |
| Bark beetle   | complete   | 50%    | 0%       | 14%         | 60%              | 0%       | 0%              | 33%          | 0%       | 21%   |
|               | uncomplete | 50%    | 50%      | 14%         | 40%              | 0%       | 67%             | 0%           | 0%       | 26%   |
|               | empty      | 0%     | 50%      | 71%         | 0%               | 100%     | 33%             | 67%          | 100%     | 53%   |
| Other biotic  | complete   | 0%     | 0%       | 29%         | 40%              | 0%       | 0%              | 17%          | 0%       | 15%   |
|               | uncomplete | 50%    | 0%       | 29%         | 40%              | 0%       | 67%             | 17%          | 0%       | 29%   |
|               | empty      | 50%    | 100%     | 43%         | 20%              | 100%     | 33%             | 67%          | 100%     | 56%   |
| Other abiotic | complete   | 50%    | 0%       | 14%         | 40%              | 0%       | 0%              | 33%          | 0%       | 18%   |
|               | uncomplete | 50%    | 0%       | 43%         | 20%              | 0%       | 33%             | 33%          | 0%       | 26%   |
|               | empty      | 0%     | 100%     | 43%         | 40%              | 100%     | 67%             | 33%          | 100%     | 56%   |

|       |            |     |     |     |     |     |     |     |     |     |
|-------|------------|-----|-----|-----|-----|-----|-----|-----|-----|-----|
| Total | complete   | 50% | 10% | 14% | 44% | 10% | 10% | 33% | 10% | 22% |
|       | uncomplete | 40% | 40% | 40% | 40% | 15% | 63% | 30% | 20% | 38% |
|       | empty      | 10% | 50% | 46% | 16% | 75% | 27% | 37% | 70% | 39% |

### Supplementary 3.

Table 3.1: List of predicting variables used to train the Random Forests (RF) models.

| Variable                               | Source | Type    | Unit  |
|----------------------------------------|--------|---------|-------|
| Standing growing stock                 | 1      | Forest  | m3    |
| Conifer standing growing stock         | 1      | Forest  | m3    |
| Forest area                            | 1      | Forest  | ha    |
| Forest average age                     | 2      | Forest  | years |
| Share of old growth forest             | 2      | Forest  | %     |
| Skeweness age class distribution       | 2      | Forest  | -     |
| Spruce growing stock                   | 1      | Forest  | m3    |
| Share of spruce forest area            | 1      | Forest  | %     |
| Mean annual temperature                | 3      | Climate | °C    |
| Mean temperature DJF                   | 3      | Climate | °C    |
| Mean temperature MAM                   | 3      | Climate | °C    |
| Mean temperature JJA                   | 3      | Climate | °C    |
| Mean temperature SON                   | 3      | Climate | °C    |
| Lagged mean annual temperature         | 3      | Climate | °C    |
| Lagged mean temperature DJF            | 3      | Climate | °C    |
| Lagged mean temperature MAM            | 3      | Climate | °C    |
| Lagged mean temperature JJA            | 3      | Climate | °C    |
| Lagged mean temperature SON            | 3      | Climate | °C    |
| Cumulative annual precipitation        | 3      | Climate | mm    |
| Comulative precipitation DJF           | 3      | Climate | mm    |
| Comulative precipitation MAM           | 3      | Climate | mm    |
| Comulative precipitation JJA           | 3      | Climate | mm    |
| Comulative precipitation SON           | 3      | Climate | mm    |
| Lagged cumulative annual precipitation | 3      | Climate | mm    |
| Lagged cumulative precipitation DJF    | 3      | Climate | mm    |
| Lagged cumulative precipitation MAM    | 3      | Climate | mm    |
| Lagged cumulative precipitation JJA    | 3      | Climate | mm    |
| Lagged cumulative precipitation SON    | 3      | Climate | mm    |
| Annual maximum wind speed (daily)      | 3      | Climate | m/s   |
| Maximum wind speed DJF (daily)         | 3      | Climate | m/s   |
| Maximum wind speed MAM (daily)         | 3      | Climate | m/s   |
| Maximum wind speed JJA (daily)         | 3      | Climate | m/s   |
| Maximum wind speed SON (daily)         | 3      | Climate | m/s   |
| Annual maximum wind speed (monthly)    | 3      | Climate | m/s   |
| Maximum wind speed DJF (monthly)       | 3      | Climate | m/s   |
| Maximum wind speed MAM (monthly)       | 3      | Climate | m/s   |

|                                  |   |         |        |
|----------------------------------|---|---------|--------|
| Maximum wind speed JJA (monthly) | 3 | Climate | m/s    |
| Maximum wind speed SON (monthly) | 3 | Climate | m/s    |
| Wind Weight Index DJF            | 4 | Climate | Kg*m/s |
| Wind Weight Index MAM            | 4 | Climate | Kg*m/s |
| Wind Weight Index JJA            | 4 | Climate | Kg*m/s |
| Wind Weight Index SON            | 4 | Climate | Kg*m/s |

Sources:

1 - FOREST EUROPE, UNECE, FAO 2020, <https://fra-data.fao.org/FE/panEuropean/home/>

2 - Vilén, T., Gunia, K., Verkerk, P. J., Seidl, R., Schelhaas, M.-J., Lindner, M., & Bellassen, V. (2012). Reconstructed forest age structure in Europe 1950–2010. *Forest Ecology and Management*, 286, 203–218. <https://doi.org/10.1016/j.foreco.2012.08.048>

3 - ERA5 reanalysis - Copernicus Climate Data Store (CDS) <https://cds.climate.copernicus.eu/>

4 – Computed using data from source 3.

Supplementary 4.

*Table 4.1: Mann-Kendall trend test (MK) and Sen's slope test (SS) parameters of reported time-series. Parameters for each disturbance agent per ecozone as well as for their sum (total disturbance). Europe indicates the sum over the 34 countries included in the study. MK test indicates the direction of the trend (between -1 and +1) and the \* indicate significance of the trend*



at  $\alpha=0.05$  confidence level. SS indicates the effect size, i.e., the average magnitude of the trend's yearly change (in  $m^3$ ).

| reported only    | Wind         |               | Fire         |               | Bark Beetles |               | Other biotic |              | Other abiotic |              | Total disturbance |               |
|------------------|--------------|---------------|--------------|---------------|--------------|---------------|--------------|--------------|---------------|--------------|-------------------|---------------|
|                  | MK tau       | SS            | MK tau       | SS            | MK tau       | SS            | MK tau       | SS           | MK tau        | SS           | MK tau            | SS            |
| Europe           | <b>0.33*</b> | <b>226602</b> | <b>0.48*</b> | <b>213313</b> | <b>0.62*</b> | <b>182759</b> | <b>0.73*</b> | <b>93171</b> | <b>0.54*</b>  | <b>47305</b> | <b>0.60*</b>      | <b>842133</b> |
| Alpine           | 0.35*        | 31721         | -            | -777          | 0.76*        | 31378         | 0.12         | 13748        | 0.48*         | 1217         | <b>0.58*</b>      | <b>96959</b>  |
| Atlantic         | -0.08        | 0             | 0.23*        | 139           | 0.01         | 0             | 0.01         | 0            | 0             | 0            | <b>0.06</b>       | <b>35</b>     |
| East Med.        | -0.09        | 0             | 0.24*        | 14310         | 0            | 0             | 0            | 0            | 0             | 0            | <b>0.22*</b>      | <b>13523</b>  |
| Central Med.     | 0.51*        | 4237          | 0.32*        | 44459         | 0.72*        | 4457          | 0.76*        | 21936        | 0.37*         | 2661         | <b>0.59*</b>      | <b>109495</b> |
| Central Pannonic | 0.24*        | 32204         | 0.52*        | 15470         | 0.49*        | 54962         | 0.62*        | 27027        | 0.24*         | 4357         | <b>0.56*</b>      | <b>184323</b> |
| Northern /Baltic | 0.36*        | 37992         | 0.15         | 902           | 0.29*        | 1501          | 0.02         | 1225         | -0.45         | -1044        | <b>0.41*</b>      | <b>61838</b>  |
| Sub-Atlantic     | 0.2          | 24583         | -0.1         | -5437         | 0.59*        | 19774         | 0.44*        | 6075         | 0.22          | 1031         | <b>0.39*</b>      | <b>101622</b> |
| West Med.        | 0.18         | 0             | 0.60*        | 92254         | 0            | 0             | 0            | 0            | 0             | 0            | <b>0.61*</b>      | <b>99454</b>  |

Table 4.2: Mann-Kendall trend test (MK) and Sen's slope test (SS) parameters of gap-filled time-series based on reported data. Parameters for each disturbance agent per ecozone as well as for their sum (total disturbance). Europe indicates the sum over the 34 countries included in the study. MK test indicates the direction of the trend (between -1 and +1) and the \* indicate significance of the trend at  $\alpha=0.05$  confidence level. SS indicates the effect size, i.e., the average magnitude of the trend's yearly change (in  $m^3$ ).

| reported gap-filled | Wind         |               | Fire         |              | Bark Beetles |               | Other biotic |              | Other abiotic |              | Total disturbance |               |
|---------------------|--------------|---------------|--------------|--------------|--------------|---------------|--------------|--------------|---------------|--------------|-------------------|---------------|
|                     | MK tau       | SS            | MK tau       | SS           | MK tau       | SS            | MK tau       | SS           | MK tau        | SS           | MK tau            | SS            |
| Europe              | <b>0.51*</b> | <b>358737</b> | <b>0.32*</b> | <b>89029</b> | <b>0.68*</b> | <b>187506</b> | <b>0.75*</b> | <b>98689</b> | <b>0.45*</b>  | <b>40558</b> | <b>0.64*</b>      | <b>864375</b> |
| Alpine              | 0.35*        | 32378         | -            | -961         | 0.71*        | 30694         |              | 13748        |               | 1087         | <b>0.57*</b>      | <b>93700</b>  |
| Atlantic            | 0.41*        | 8196          | 0.23         | 62           | 0            | 0             | 0            | 0            | 0             | 0            | <b>0.41*</b>      | <b>8474</b>   |

|                  |                      |                      |                          |                         |                     |     |                               |
|------------------|----------------------|----------------------|--------------------------|-------------------------|---------------------|-----|-------------------------------|
| East Med.        | -<br>0.0<br>9 0      | 0.0<br>5 3152        | 0 0                      | 0 0                     | 0 0                 | 0 0 | <b>0.03</b><br><b>2452</b>    |
| Central Med.     | 0.6<br>6* 8921       | 0.0<br>9 10660       | 0.73<br>* 406<br>2       | 0.72<br>* 201<br>37     | 0.33<br>* 309<br>3  |     | <b>0.54*</b><br><b>78511</b>  |
| Central Pannonic | 0.5<br>7* 1444<br>30 | 0.3<br>8* 12436      | 0.68<br>* 997<br>67      | 0.66<br>* 433<br>57     | 0.39<br>* 275<br>68 |     | <b>0.78*</b><br><b>367862</b> |
| Northern/Baltic  | 0.3<br>4* 5015<br>9  | -<br>0.0<br>9 -686   | -<br>0.45<br>* 207<br>71 | -<br>0.47<br>* 297<br>6 | -<br>0.07<br>-19    |     | <b>0.23*</b><br><b>43625</b>  |
| Sub-Atlantic     | 0.3<br>9* 6348<br>7  | -<br>0.3<br>1* -9193 | 0.39<br>* 309<br>78      | 0.68<br>* 902<br>7      | 0.23<br>* 173<br>8  |     | <b>0.47*</b><br><b>139346</b> |
| West Med.        | 0.1<br>8 0           | 0.3<br>2* 43988      | 0 0                      | 0 0                     | 0 0                 |     | <b>0.31*</b><br><b>49749</b>  |

### Supplementary 5.

Standardized Disturbance Index (SDI, in m<sup>3</sup>/ha/year) average per decade for all the countries. Time-series for reported, expert gap-filled and reported gap-filled, respectively.

| Country | decade | SDI Reported | SDI Expert gapfilled | SDI Reported Gapfilled |
|---------|--------|--------------|----------------------|------------------------|
| Albania | 1950s  |              | 0.00920723           | 0.05558071             |
| Albania | 1960s  |              | 0.01477867           | 0.0666633              |
| Albania | 1970s  |              | 0.01360625           | 0.06616609             |
| Albania | 1980s  | 0.0003423    | 0.00988116           | 0.07377644             |
| Albania | 1990s  | 0.00126896   | 0.01531101           | 0.07816391             |
| Albania | 2000s  | 0.00105257   | 0.01591734           | 0.08236433             |
| Albania | 2010s  |              | 0.01976236           | 0.12447501             |
| Austria | 1950s  | 0.08076007   | 0.15637442           | 0.15789814             |
| Austria | 1960s  | 0.26292544   | 0.33346914           | 0.33698283             |
| Austria | 1970s  | 0.65324457   | 0.71915973           | 0.72002026             |
| Austria | 1980s  | 0.57982036   | 0.64784915           | 0.65104008             |
| Austria | 1990s  | 0.99042183   | 1.04133307           | 1.04128605             |
| Austria | 2000s  | 1.62513813   | 1.62602104           | 1.62598156             |
| Austria | 2010s  | 1.57819989   | 1.57819989           | 1.57819989             |
| Belgium | 1950s  |              | 0.01176198           | 0.81054901             |
| Belgium | 1960s  |              | 0.00883308           | 0.94980299             |
| Belgium | 1970s  | 0.02547457   | 0.02786548           | 1.3747369              |
| Belgium | 1980s  | 1.94560712   | 1.95177794           | 2.75210883             |
| Belgium | 1990s  | 0.8196367    | 0.82580546           | 2.04609409             |
| Belgium | 2000s  | 0.0439175    | 0.0578031            | 1.46992269             |

|                      |       |            |            |            |
|----------------------|-------|------------|------------|------------|
| Belgium              | 2010s |            | 0.01394317 | 1.86079377 |
| Bosnia & Herzegovina | 1950s |            | 0.06511373 | 0.05454674 |
| Bosnia & Herzegovina | 1960s |            | 0.08443535 | 0.06353325 |
| Bosnia & Herzegovina | 1970s |            | 0.06795482 | 0.06335852 |
| Bosnia & Herzegovina | 1980s |            | 0.0249639  | 0.05872419 |
| Bosnia & Herzegovina | 1990s |            | 0.06819252 | 0.05926507 |
| Bosnia & Herzegovina | 2000s | 0.0021512  | 0.16209233 | 0.07615305 |
| Bosnia & Herzegovina | 2010s | 0.01061673 | 0.08891291 | 0.10729684 |
| Bulgaria             | 1950s | 0.00087326 | 0.10908275 | 0.10376189 |
| Bulgaria             | 1960s | 0.03155092 | 0.08550849 | 0.08652785 |
| Bulgaria             | 1970s | 0.00758096 | 0.02777083 | 0.02643302 |
| Bulgaria             | 1980s | 0.04217218 | 0.04217218 | 0.04217218 |
| Bulgaria             | 1990s | 0.19324919 | 0.19324919 | 0.19324919 |
| Bulgaria             | 2000s | 0.4094997  | 0.4094997  | 0.4094997  |
| Bulgaria             | 2010s | 0.1354645  | 0.1354645  | 0.1354645  |
| Croatia              | 1950s |            | 0.02245696 | 0.08289176 |
| Croatia              | 1960s |            | 0.09129624 | 0.16340757 |
| Croatia              | 1970s | 0.0532881  | 0.08621655 | 0.15769128 |
| Croatia              | 1980s | 0.09019734 | 0.15406702 | 0.18302967 |
| Croatia              | 1990s | 0.27735897 | 0.32574155 | 0.34966499 |
| Croatia              | 2000s | 0.53630517 | 0.53630517 | 0.53630517 |
| Croatia              | 2010s | 0.60758559 | 0.60758559 | 0.60758559 |
| Cyprus               | 1950s |            | 0.22921345 | 0.16561915 |
| Cyprus               | 1960s |            | 0.28052483 | 0.18947876 |
| Cyprus               | 1970s | 0.05428825 | 0.25299729 | 0.18722095 |
| Cyprus               | 1980s | 0.11398012 | 0.11572746 | 0.11398012 |
| Cyprus               | 1990s | 0.17140621 | 0.17389384 | 0.17140621 |
| Cyprus               | 2000s | 0.62994042 | 0.63149996 | 0.62994042 |
| Cyprus               | 2010s | 0.33744719 | 0.33906524 | 0.33744719 |
| Czechia              | 1950s | 0.36326918 | 0.40365085 | 0.68802138 |
| Czechia              | 1960s | 0.69147816 | 0.73755614 | 0.8366083  |
| Czechia              | 1970s | 1.17135429 | 1.21722123 | 1.26775444 |
| Czechia              | 1980s | 2.43383869 | 2.47413796 | 2.49489621 |
| Czechia              | 1990s | 1.92052965 | 1.9732805  | 2.07865045 |
| Czechia              | 2000s | 3.11784556 | 3.15759387 | 3.20215136 |
| Czechia              | 2010s | 4.14911946 | 4.18039708 | 4.34788264 |
| Denmark              | 1950s | 0.2213565  | 0.23076008 | 0.53319172 |
| Denmark              | 1960s | 0.80183239 | 0.81543554 | 1.28067289 |
| Denmark              | 1970s | 0.08734644 | 0.09440371 | 0.87325304 |
| Denmark              | 1980s | 0.95354702 | 0.96004992 | 1.60193904 |
| Denmark              | 1990s | 0.82652612 | 0.83111739 | 1.63546328 |
| Denmark              | 2000s | 0.38633402 | 0.39216971 | 1.21380601 |
| Denmark              | 2010s | 0.08204738 | 0.08977088 | 1.03117472 |
| Estonia              | 1950s | 0.01555219 | 0.42001601 | 0.47373035 |
| Estonia              | 1960s | 0.01512821 | 0.38803287 | 0.44397117 |
| Estonia              | 1970s | 0.00172621 | 0.35270118 | 0.40538032 |

|         |       |            |            |            |
|---------|-------|------------|------------|------------|
| Estonia | 1980s | 0.00187045 | 0.33177101 | 0.36435254 |
| Estonia | 1990s | 0.01805364 | 0.25697982 | 0.27434817 |
| Estonia | 2000s | 0.21026516 | 0.3010227  | 0.30029634 |
| Estonia | 2010s | 0.07734268 | 0.1706195  | 0.16691411 |
| Finland | 1950s | 0.0050114  | 0.02002669 | 0.0339069  |
| Finland | 1960s | 0.00613914 | 0.02063585 | 0.04106523 |
| Finland | 1970s | 0.02256997 | 0.03347145 | 0.05513743 |
| Finland | 1980s | 0.03653819 | 0.0484582  | 0.07431661 |
| Finland | 1990s | 0.00105088 | 0.02264825 | 0.0414179  |
| Finland | 2000s | 0.03928881 | 0.04520781 | 0.0489387  |
| Finland | 2010s | 0.11179167 | 0.11183663 | 0.11182802 |
| France  | 1950s | 0.02243596 | 0.06694719 | 0.11197971 |
| France  | 1960s | 0.12217672 | 0.12260832 | 0.1667812  |
| France  | 1970s | 0.10474737 | 0.10488986 | 0.1621709  |
| France  | 1980s | 0.37793446 | 0.37866576 | 0.41915296 |
| France  | 1990s | 1.34298547 | 1.34510557 | 1.42318827 |
| France  | 2000s | 0.35257931 | 0.35420003 | 0.44101513 |
| France  | 2010s | 0.078006   | 0.07907983 | 0.17662387 |
| Germany | 1950s | 0.18681088 | 0.18681088 | 0.20796503 |
| Germany | 1960s | 0.35081705 | 0.35081705 | 0.36029101 |
| Germany | 1970s | 0.55899895 | 0.55899895 | 0.57025044 |
| Germany | 1980s | 0.20311723 | 0.20311723 | 0.23288541 |
| Germany | 1990s | 1.26719777 | 1.26719777 | 1.29907761 |
| Germany | 2000s | 0.74520557 | 0.74520557 | 0.74520557 |
| Germany | 2010s | 0.79478564 | 0.79478564 | 0.79478564 |
| Greece  | 1950s |            | 0.26689052 | 0.2528618  |
| Greece  | 1960s | 0.17220677 | 0.17222429 | 0.17220677 |
| Greece  | 1970s | 0.23766635 | 0.23767576 | 0.23766635 |
| Greece  | 1980s | 0.52149387 | 0.52150852 | 0.52149387 |
| Greece  | 1990s | 0.47414448 | 0.47416197 | 0.47414448 |
| Greece  | 2000s | 0.48616449 | 0.48618121 | 0.48616449 |
| Greece  | 2010s | 0.22920311 | 0.2292152  | 0.22920311 |
| Hungary | 1950s |            | 0.05185346 | 0.71716771 |
| Hungary | 1960s |            | 0.06442537 | 0.67397687 |
| Hungary | 1970s | 0.00849211 | 0.06673248 | 0.6279708  |
| Hungary | 1980s | 0.09394662 | 0.15709258 | 0.64264951 |
| Hungary | 1990s | 0.26011168 | 0.30457767 | 0.70508916 |
| Hungary | 2000s | 0.16341223 | 0.31777531 | 0.70874945 |
| Hungary | 2010s | 0.34967292 | 0.48762092 | 0.99037397 |
| Ireland | 1950s |            | 0          | 0.20890439 |
| Ireland | 1960s |            | 0          | 0.10022103 |
| Ireland | 1970s | 0.27345908 | 0.27345908 | 0.2851153  |
| Ireland | 1980s | 0.20882004 | 0.20882004 | 0.20882004 |
| Ireland | 1990s | 0.06590938 | 0.06590938 | 0.22183971 |
| Ireland | 2000s | 0.01620711 | 0.01620711 | 0.15517518 |
| Ireland | 2010s | 0.02005198 | 0.02005198 | 0.32801182 |

|                 |       |            |            |            |
|-----------------|-------|------------|------------|------------|
| Italy           | 1950s |            | 0.25255791 | 0.37406003 |
| Italy           | 1960s | 0.01454818 | 0.23768074 | 0.32173856 |
| Italy           | 1970s | 0.38380042 | 0.40875151 | 0.42211248 |
| Italy           | 1980s | 0.75858316 | 0.78285122 | 0.7985013  |
| Italy           | 1990s | 0.53442563 | 0.56490223 | 0.56868779 |
| Italy           | 2000s | 0.34160302 | 0.38575635 | 0.3921485  |
| Italy           | 2010s | 0.33574201 | 0.38842088 | 0.40142087 |
| Latvia          | 1950s |            | 0.23122703 | 0.27892996 |
| Latvia          | 1960s |            | 0.21688357 | 0.2614418  |
| Latvia          | 1970s |            | 0.2242469  | 0.26652515 |
| Latvia          | 1980s | 0.00100693 | 0.21860726 | 0.23987025 |
| Latvia          | 1990s | 0.01622526 | 0.17059003 | 0.17933656 |
| Latvia          | 2000s | 0.2533164  | 0.36606007 | 0.36560573 |
| Latvia          | 2010s | 0.00702608 | 0.10456872 | 0.10005119 |
| Lithuania       | 1950s |            | 0.32060206 | 0.44704509 |
| Lithuania       | 1960s |            | 0.30894755 | 0.43188677 |
| Lithuania       | 1970s |            | 0.40624102 | 0.50491586 |
| Lithuania       | 1980s | 0.00082672 | 0.45360887 | 0.47343252 |
| Lithuania       | 1990s | 0.46321098 | 0.64430372 | 0.66326021 |
| Lithuania       | 2000s | 0.09552732 | 0.21588625 | 0.21963787 |
| Lithuania       | 2010s | 0.11774767 | 0.13444288 | 0.13503912 |
| Luxembourg      | 1950s |            | 0.10666756 | 1.28913349 |
| Luxembourg      | 1960s |            | 0.08440893 | 0.98220484 |
| Luxembourg      | 1970s | 0.00173475 | 0.07965089 | 1.14851252 |
| Luxembourg      | 1980s | 0.00030117 | 0.10541267 | 1.2010199  |
| Luxembourg      | 1990s | 1.86570279 | 1.93061396 | 3.93686155 |
| Luxembourg      | 2000s |            | 0.08159169 | 2.36514118 |
| Luxembourg      | 2010s |            | 0.02332873 | 2.16311718 |
| Netherlands     | 1950s | 0.02131434 | 0.02719428 | 0.82619303 |
| Netherlands     | 1960s | 0.01017621 | 0.01556453 | 0.73304178 |
| Netherlands     | 1970s | 0.62811653 | 0.63207236 | 1.29145152 |
| Netherlands     | 1980s | 0.00422995 | 0.0083212  | 0.55392035 |
| Netherlands     | 1990s | 0.12579402 | 0.13150839 | 1.31578193 |
| Netherlands     | 2000s | 0.06769821 | 0.08153003 | 1.39247866 |
| Netherlands     | 2010s | 0.00762489 | 0.01908457 | 1.4561073  |
| North Macedonia | 1950s |            | 0.00870653 | 0.06805322 |
| North Macedonia | 1960s |            | 0.0099354  | 0.07250708 |
| North Macedonia | 1970s |            | 0.01234126 | 0.07308118 |
| North Macedonia | 1980s | 0.0003145  | 0.00956733 | 0.07390219 |
| North Macedonia | 1990s | 0.03606862 | 0.04513741 | 0.09129001 |
| North Macedonia | 2000s | 0.16143181 | 0.17469454 | 0.21783488 |
| North Macedonia | 2010s | 0.1176585  | 0.13183352 | 0.19002246 |
| Norway          | 1950s |            | 0.03684955 | 0.0798116  |
| Norway          | 1960s | 0.0378198  | 0.06245874 | 0.0997437  |
| Norway          | 1970s | 0.05310038 | 0.06387975 | 0.10419681 |
| Norway          | 1980s | 0.03417682 | 0.05456634 | 0.08599001 |

|          |       |            |            |            |
|----------|-------|------------|------------|------------|
| Norway   | 1990s | 0.03449895 | 0.05311897 | 0.06685974 |
| Norway   | 2000s | 0.00873901 | 0.02844735 | 0.03967246 |
| Norway   | 2010s | 0.00342512 | 0.01772791 | 0.03597369 |
| Poland   | 1950s | 0.13349123 | 0.13408441 | 0.36381002 |
| Poland   | 1960s | 0.08252116 | 0.14467084 | 0.32255598 |
| Poland   | 1970s | 0.0931157  | 0.22964244 | 0.62281729 |
| Poland   | 1980s | 0.37299576 | 0.47144766 | 0.7769649  |
| Poland   | 1990s | 0.55706796 | 0.57979379 | 0.81782364 |
| Poland   | 2000s | 0.5467812  | 0.72460938 | 1.00088574 |
| Poland   | 2010s | 1.0054325  | 1.01567585 | 1.05593334 |
| Portugal | 1950s |            | 0.88690607 | 0.87002265 |
| Portugal | 1960s |            | 0.89523778 | 0.87396078 |
| Portugal | 1970s | 0.18411475 | 0.79445864 | 0.79350323 |
| Portugal | 1980s | 1.04454902 | 1.04454902 | 1.04454902 |
| Portugal | 1990s | 1.29865739 | 1.29865739 | 1.29865739 |
| Portugal | 2000s | 1.95338525 | 1.95338525 | 1.95338525 |
| Portugal | 2010s | 1.74054775 | 1.74054775 | 1.74054775 |
| Romania  | 1950s | 0.07495157 | 0.0978931  | 0.490292   |
| Romania  | 1960s | 0.58348331 | 0.68436651 | 0.83760494 |
| Romania  | 1970s | 0.54309103 | 0.67474333 | 0.75024374 |
| Romania  | 1980s | 0.00144331 | 0.58420623 | 0.79423785 |
| Romania  | 1990s | 0.14766693 | 0.69973141 | 0.79019978 |
| Romania  | 2000s | 0.03530345 | 0.7794374  | 1.04648932 |
| Romania  | 2010s | 0.04091184 | 0.90463129 | 1.40883441 |
| Serbia   | 1950s |            | 0.00800203 | 0.03505423 |
| Serbia   | 1960s | 0.00284333 | 0.01321146 | 0.0367393  |
| Serbia   | 1970s | 0.00546362 | 0.01716826 | 0.03570226 |
| Serbia   | 1980s | 0.00187195 | 0.01584681 | 0.03070431 |
| Serbia   | 1990s | 0.00993794 | 0.02621385 | 0.03255348 |
| Serbia   | 2000s | 0.02932091 | 0.04738637 | 0.0509693  |
| Serbia   | 2010s | 0.07087079 | 0.07444923 | 0.07754822 |
| Slovakia | 1950s | 0.05409436 | 0.06280437 | 0.73794867 |
| Slovakia | 1960s | 0.92160941 | 0.93495565 | 0.93553153 |
| Slovakia | 1970s | 0.55081118 | 0.56217009 | 0.56214112 |
| Slovakia | 1980s | 0.90139445 | 0.91732386 | 0.91615583 |
| Slovakia | 1990s | 1.24668975 | 1.24861427 | 1.24841103 |
| Slovakia | 2000s | 2.05204862 | 2.05204862 | 2.05204862 |
| Slovakia | 2010s | 2.51456652 | 2.51470455 | 2.54305744 |
| Slovenia | 1950s | 0.03526556 | 0.04008983 | 0.14365346 |
| Slovenia | 1960s | 0.10664909 | 0.11222558 | 0.24309479 |
| Slovenia | 1970s | 0.10175269 | 0.10547174 | 0.17398908 |
| Slovenia | 1980s | 0.52653779 | 0.53294745 | 0.62597598 |
| Slovenia | 1990s | 0.56789194 | 0.56969656 | 0.66708761 |
| Slovenia | 2000s | 0.86074945 | 0.8619619  | 0.86211083 |
| Slovenia | 2010s | 2.5289845  | 2.5289845  | 2.5289845  |
| Spain    | 1950s |            | 0.04060528 | 0.03824622 |

|                |       |            |            |            |
|----------------|-------|------------|------------|------------|
| Spain          | 1960s | 0.01349866 | 0.01530075 | 0.01516951 |
| Spain          | 1970s | 0.11925223 | 0.11925223 | 0.11925223 |
| Spain          | 1980s | 0.15903813 | 0.15903813 | 0.15903813 |
| Spain          | 1990s | 0.10823757 | 0.10823757 | 0.10823757 |
| Spain          | 2000s | 0.05094815 | 0.05094815 | 0.05094815 |
| Spain          | 2010s | 0.03547538 | 0.03547538 | 0.03547538 |
| Sweden         | 1950s | 0.08358513 | 0.09331609 | 0.09417147 |
| Sweden         | 1960s | 0.18384692 | 0.19501451 | 0.20205949 |
| Sweden         | 1970s | 0.04425618 | 0.04787412 | 0.05943489 |
| Sweden         | 1980s | 0.05210665 | 0.0629285  | 0.07681462 |
| Sweden         | 1990s | 0.06071254 | 0.07191478 | 0.0793072  |
| Sweden         | 2000s | 0.42449413 | 0.43662353 | 0.44244139 |
| Sweden         | 2010s | 0.117722   | 0.1297536  | 0.13018606 |
| Switzerland    | 1950s | 0.12352548 | 0.29645239 | 0.47829302 |
| Switzerland    | 1960s | 0.71996291 | 0.9652528  | 1.19284094 |
| Switzerland    | 1970s | 0.14823716 | 0.54176908 | 0.78354211 |
| Switzerland    | 1980s | 0.34780658 | 0.57145901 | 0.77043478 |
| Switzerland    | 1990s | 1.84021207 | 1.91186181 | 2.06254664 |
| Switzerland    | 2000s | 0.72164188 | 0.8171763  | 0.97638772 |
| Switzerland    | 2010s | 0.47959642 | 0.58303741 | 0.72914408 |
| Turkey         | 1950s | 0.17980951 | 0.17981191 | 0.17980951 |
| Turkey         | 1960s | 0.04844131 | 0.04844382 | 0.04844131 |
| Turkey         | 1970s | 0.105627   | 0.10562914 | 0.105627   |
| Turkey         | 1980s | 0.05325354 | 0.05325733 | 0.05325354 |
| Turkey         | 1990s | 0.03822534 | 0.03822684 | 0.03822534 |
| Turkey         | 2000s | 0.02642086 | 0.02642255 | 0.02642086 |
| Turkey         | 2010s | 0.0143412  | 0.01434327 | 0.0143412  |
| United Kingdom | 1950s | 0.12906973 | 0.12906973 | 0.28118766 |
| United Kingdom | 1960s | 0.08778679 | 0.08778679 | 0.19386441 |
| United Kingdom | 1970s | 0.14333529 | 0.14333529 | 0.23365454 |
| United Kingdom | 1980s | 0.15992879 | 0.15992879 | 0.2722479  |
| United Kingdom | 1990s | 0.26055715 | 0.26055715 | 0.39441007 |
| United Kingdom | 2000s |            | 0          | 0.19075791 |
| United Kingdom | 2010s | 0.21695437 | 0.21695437 | 0.38022356 |
